# Supplementary material for: Area-Wide Elimination of Subterranean Termite Colonies Using a Novaluron Bait
Source: MDPI journal article supplement (doi:10.3390/insects12030192), 2021-02-24
Supplement: s1 [file s1]

# Control Site

| Colony.year | 1.1     | 1.2     | 1.3     | 1.4    | 2.1     | 2.3     | 2.4    | 3.1     | 3.3     | 3.4    | 4.1    | 5.1     | 5.3     | 5.4    | 6.1     | 6.2     | 6.3     | 6.4    | 7.2    | 8.2     | 8.3    | 8.4    | 9.2    | 10.2    | 10.3   | 10.4   | 11.3   | 11.4   | 12.3 | 13.3 | 13.4 | 14.3 | 14.4 | 15.4 | 16.4 | 17.4 | v.1  | v.2  | v.3  | v.4  |      |      |      |
|-------------|---------|---------|---------|--------|---------|---------|--------|---------|---------|--------|--------|---------|---------|--------|---------|---------|---------|--------|--------|---------|--------|--------|--------|---------|--------|--------|--------|--------|------|------|------|------|------|------|------|------|------|------|------|------|------|------|------|
| 1.1         |         | 0.93    | 0.98    | 0.92   | 0.00    | 0.00    | 0.00   | 0.00    | 0.00    | 0.00   | 0.00   | 0.00    | 0.00    | 0.00   | 0.00    | 0.00    | 0.00    | 0.00   | 0.00   | 0.00    | 0.00   | 0.00   | 0.00   | 0.00    | 0.00   | 0.00   | 0.00   | 0.00   | 0.00 | 0.00 | 0.00 | 0.00 | 0.00 | 0.00 | 0.00 | 0.00 | 0.00 | 0.00 | 0.00 | 0.00 | 0.00 |      |      |
| 1.2         | -0.0492 |         | 0.75    | 0.94   | 0.00    | 0.00    | 0.00   | 0.00    | 0.00    | 0.00   | 0.00   | 0.00    | 0.00    | 0.00   | 0.00    | 0.00    | 0.00    | 0.00   | 0.00   | 0.00    | 0.00   | 0.00   | 0.00   | 0.00    | 0.00   | 0.00   | 0.00   | 0.00   | 0.00 | 0.00 | 0.00 | 0.00 | 0.00 | 0.00 | 0.00 | 0.00 | 0.00 | 0.00 | 0.00 | 0.00 | 0.00 | 0.00 |      |
| 1.3         | -0.0739 | -0.0273 |         | 0.83   | 0.00    | 0.00    | 0.00   | 0.00    | 0.00    | 0.00   | 0.00   | 0.00    | 0.00    | 0.00   | 0.00    | 0.00    | 0.00    | 0.00   | 0.00   | 0.00    | 0.00   | 0.00   | 0.00   | 0.00    | 0.00   | 0.00   | 0.00   | 0.00   | 0.00 | 0.00 | 0.00 | 0.00 | 0.00 | 0.00 | 0.00 | 0.00 | 0.00 | 0.00 | 0.00 | 0.00 | 0.00 | 0.00 |      |
| 1.4         | -0.0443 | -0.0262 | -0.0200 |        | 0.00    | 0.00    | 0.00   | 0.00    | 0.00    | 0.00   | 0.00   | 0.00    | 0.00    | 0.00   | 0.00    | 0.00    | 0.00    | 0.00   | 0.00   | 0.00    | 0.00   | 0.00   | 0.00   | 0.00    | 0.00   | 0.00   | 0.00   | 0.00   | 0.00 | 0.00 | 0.00 | 0.00 | 0.00 | 0.00 | 0.00 | 0.00 | 0.00 | 0.00 | 0.00 | 0.00 | 0.00 | 0.00 |      |
| 2.1         | 0.3107  | 0.3184  | 0.3125  | 0.3402 |         | 0.20    | 0.69   | 0.00    | 0.00    | 0.00   | 0.00   | 0.00    | 0.00    | 0.00   | 0.00    | 0.00    | 0.00    | 0.00   | 0.00   | 0.00    | 0.00   | 0.00   | 0.00   | 0.00    | 0.00   | 0.00   | 0.00   | 0.00   | 0.00 | 0.00 | 0.00 | 0.00 | 0.00 | 0.00 | 0.00 | 0.00 | 0.00 | 0.00 | 0.00 | 0.00 | 0.00 | 0.00 | 0.00 |
| 2.3         | 0.2991  | 0.2999  | 0.2988  | 0.3198 | 0.0028  |         | 0.70   | 0.00    | 0.00    | 0.00   | 0.00   | 0.00    | 0.00    | 0.00   | 0.00    | 0.00    | 0.00    | 0.00   | 0.00   | 0.00    | 0.00   | 0.00   | 0.00   | 0.00    | 0.00   | 0.00   | 0.00   | 0.00   | 0.00 | 0.00 | 0.00 | 0.00 | 0.00 | 0.00 | 0.00 | 0.00 | 0.00 | 0.00 | 0.00 | 0.00 | 0.00 | 0.00 |      |
| 2.4         | 0.3045  | 0.3103  | 0.3058  | 0.3323 | -0.0052 | -0.0037 |        | 0.00    | 0.00    | 0.00   | 0.00   | 0.00    | 0.00    | 0.00   | 0.00    | 0.00    | 0.00    | 0.00   | 0.00   | 0.00    | 0.00   | 0.00   | 0.00   | 0.00    | 0.00   | 0.00   | 0.00   | 0.00   | 0.00 | 0.00 | 0.00 | 0.00 | 0.00 | 0.00 | 0.00 | 0.00 | 0.00 | 0.00 | 0.00 | 0.00 | 0.00 | 0.00 |      |
| 3.1         | 0.4259  | 0.4158  | 0.4249  | 0.4400 | 0.3200  | 0.2933  | 0.3092 |         | 0.92    | 0.78   | 0.00   | 0.00    | 0.00    | 0.00   | 0.00    | 0.00    | 0.00    | 0.00   | 0.00   | 0.00    | 0.00   | 0.00   | 0.00   | 0.00    | 0.00   | 0.00   | 0.00   | 0.00   | 0.00 | 0.00 | 0.00 | 0.00 | 0.00 | 0.00 | 0.00 | 0.00 | 0.00 | 0.00 | 0.00 | 0.00 | 0.00 | 0.00 |      |
| 3.3         | 0.4292  | 0.4177  | 0.4282  | 0.4431 | 0.3195  | 0.2920  | 0.3084 | -0.0080 |         | 0.89   | 0.00   | 0.00    | 0.00    | 0.00   | 0.00    | 0.00    | 0.00    | 0.00   | 0.00   | 0.00    | 0.00   | 0.00   | 0.00   | 0.00    | 0.00   | 0.00   | 0.00   | 0.00   | 0.00 | 0.00 | 0.00 | 0.00 | 0.00 | 0.00 | 0.00 | 0.00 | 0.00 | 0.00 | 0.00 | 0.00 | 0.00 | 0.00 |      |
| 3.4         | 0.3986  | 0.3951  | 0.4032  | 0.4252 | 0.2847  | 0.2672  | 0.2760 | -0.0127 | -0.0142 |        | 0.00   | 0.00    | 0.00    | 0.00   | 0.00    | 0.00    | 0.00    | 0.00   | 0.00   | 0.00    | 0.00   | 0.00   | 0.00   | 0.00    | 0.00   | 0.00   | 0.00   | 0.00   | 0.00 | 0.00 | 0.00 | 0.00 | 0.00 | 0.00 | 0.00 | 0.00 | 0.00 | 0.00 | 0.00 | 0.00 | 0.00 | 0.00 |      |
| 4.1         | 0.4288  | 0.4549  | 0.4362  | 0.4638 | 0.3544  | 0.3446  | 0.3498 | 0.4832  | 0.4899  | 0.4624 |        | 0.00    | 0.00    | 0.00   | 0.00    | 0.00    | 0.00    | 0.00   | 0.00   | 0.00    | 0.00   | 0.00   | 0.00   | 0.00    | 0.00   | 0.00   | 0.00   | 0.00   | 0.00 | 0.00 | 0.00 | 0.00 | 0.00 | 0.00 | 0.00 | 0.00 | 0.00 | 0.00 | 0.00 | 0.00 | 0.00 | 0.00 |      |
| 5.1         | 0.4619  | 0.4769  | 0.4642  | 0.4829 | 0.3844  | 0.3682  | 0.3797 | 0.4957  | 0.5015  | 0.4827 | 0.2776 |         | 0.98    | 0.21   | 0.00    | 0.00    | 0.00    | 0.00   | 0.00   | 0.00    | 0.00   | 0.00   | 0.00   | 0.00    | 0.00   | 0.00   | 0.00   | 0.00   | 0.00 | 0.00 | 0.00 | 0.00 | 0.00 | 0.00 | 0.00 | 0.00 | 0.00 | 0.00 | 0.00 | 0.00 | 0.00 | 0.00 |      |
| 5.3         | 0.4598  | 0.4761  | 0.4628  | 0.4826 | 0.3814  | 0.3656  | 0.3766 | 0.4959  | 0.5018  | 0.4823 | 0.2780 | -0.0159 |         | 0.49   | 0.00    | 0.00    | 0.00    | 0.00   | 0.00   | 0.00    | 0.00   | 0.00   | 0.00   | 0.00    | 0.00   | 0.00   | 0.00   | 0.00   | 0.00 | 0.00 | 0.00 | 0.00 | 0.00 | 0.00 | 0.00 | 0.00 | 0.00 | 0.00 | 0.00 | 0.00 | 0.00 | 0.00 |      |
| 5.4         | 0.4882  | 0.4969  | 0.4885  | 0.5007 | 0.4175  | 0.3959  | 0.4133 | 0.5079  | 0.5127  | 0.5020 | 0.3172 | -0.0006 | -0.0058 |        | 0.00    | 0.00    | 0.00    | 0.00   | 0.00   | 0.00    | 0.00   | 0.00   | 0.00   | 0.00    | 0.00   | 0.00   | 0.00   | 0.00   | 0.00 | 0.00 | 0.00 | 0.00 | 0.00 | 0.00 | 0.00 | 0.00 | 0.00 | 0.00 | 0.00 | 0.00 | 0.00 |      |      |
| 6.1         | 0.4795  | 0.5037  | 0.4890  | 0.5139 | 0.3977  | 0.3839  | 0.3924 | 0.4773  | 0.4861  | 0.4580 | 0.3409 | 0.4716  | 0.4720  | 0.5008 |         | 0.95    | 0.95    | 1.00   | 0.00   | 0.00    | 0.00   | 0.00   | 0.00   | 0.00    | 0.00   | 0.00   | 0.00   | 0.00   | 0.00 | 0.00 | 0.00 | 0.00 | 0.00 | 0.00 | 0.00 | 0.00 | 0.00 | 0.00 | 0.00 | 0.00 | 0.00 | 0.00 |      |
| 6.2         | 0.5369  | 0.5428  | 0.5375  | 0.5469 | 0.4535  | 0.4236  | 0.4484 | 0.4942  | 0.5018  | 0.4833 | 0.3910 | 0.5113  | 0.5131  | 0.5266 | -0.0575 |         | 0.77    | 0.70   | 0.00   | 0.00    | 0.00   | 0.00   | 0.00   | 0.00    | 0.00   | 0.00   | 0.00   | 0.00   | 0.00 | 0.00 | 0.00 | 0.00 | 0.00 | 0.00 | 0.00 | 0.00 | 0.00 | 0.00 | 0.00 | 0.00 | 0.00 |      |      |
| 6.3         | 0.5295  | 0.5360  | 0.5295  | 0.5383 | 0.4646  | 0.4380  | 0.4622 | 0.4847  | 0.4902  | 0.4704 | 0.3869 | 0.5061  | 0.5076  | 0.5230 | -0.0498 | -0.0129 |         | 0.86   | 0.00   | 0.00    | 0.00   | 0.00   | 0.00   | 0.00    | 0.00   | 0.00   | 0.00   | 0.00   | 0.00 | 0.00 | 0.00 | 0.00 | 0.00 | 0.00 | 0.00 | 0.00 | 0.00 | 0.00 | 0.00 | 0.00 | 0.00 |      |      |
| 6.4         | 0.5181  | 0.5260  | 0.5184  | 0.5289 | 0.4477  | 0.4214  | 0.4445 | 0.4806  | 0.4865  | 0.4649 | 0.3674 | 0.4918  | 0.4933  | 0.5112 | -0.0578 | -0.0139 | -0.0098 |        | 0.00   | 0.00    | 0.00   | 0.00   | 0.00   | 0.00    | 0.00   | 0.00   | 0.00   | 0.00   | 0.00 | 0.00 | 0.00 | 0.00 | 0.00 | 0.00 | 0.00 | 0.00 | 0.00 | 0.00 | 0.00 | 0.00 | 0.00 | 0.00 |      |
| 7.2         | 0.4230  | 0.4502  | 0.4313  | 0.4599 | 0.3444  | 0.3346  | 0.3402 | 0.4778  | 0.4842  | 0.4583 | 0.1344 | 0.2689  | 0.2724  | 0.3145 | 0.4163  | 0.4731  | 0.4616  | 0.4439 |        | 0.01    | 0.00   | 0.00   | 0.00   | 0.00    | 0.00   | 0.00   | 0.00   | 0.00   | 0.00 | 0.00 | 0.00 | 0.00 | 0.00 | 0.00 | 0.00 | 0.00 | 0.00 | 0.00 | 0.00 | 0.00 | 0.00 | 0.00 |      |
| 8.2         | 0.4839  | 0.4975  | 0.4863  | 0.5040 | 0.3678  | 0.3592  | 0.3664 | 0.5140  | 0.5202  | 0.5054 | 0.3361 | 0.4259  | 0.4292  | 0.4581 | 0.4854  | 0.5199  | 0.5073  | 0.4956 | 0.3318 |         | 0.87   | 0.28   | 0.00   | 0.00    | 0.00   | 0.00   | 0.00   | 0.00   | 0.00 | 0.00 | 0.00 | 0.00 | 0.00 | 0.00 | 0.00 | 0.00 | 0.00 | 0.00 | 0.00 | 0.00 | 0.00 | 0.00 |      |
| 8.3         | 0.4800  | 0.4904  | 0.4807  | 0.4956 | 0.3707  | 0.3613  | 0.3688 | 0.5032  | 0.5083  | 0.4951 | 0.3241 | 0.4131  | 0.4175  | 0.4440 | 0.4774  | 0.5040  | 0.4963  | 0.4841 | 0.3192 | -0.0121 |        | 0.09   | 0.00   | 0.00    | 0.00   | 0.00   | 0.00   | 0.00   | 0.00 | 0.00 | 0.00 | 0.00 | 0.00 | 0.00 | 0.00 | 0.00 | 0.00 | 0.00 | 0.00 | 0.00 | 0.00 | 0.00 |      |
| 8.4         | 0.4843  | 0.4934  | 0.4846  | 0.4978 | 0.3885  | 0.3758  | 0.3857 | 0.5056  | 0.5105  | 0.5001 | 0.3299 | 0.4031  | 0.4095  | 0.4366 | 0.4749  | 0.4982  | 0.4885  | 0.4768 | 0.3072 | 0.0131  | 0.0093 |        | 0.00   | 0.00    | 0.00   | 0.00   | 0.00   | 0.00   | 0.00 | 0.00 | 0.00 | 0.00 | 0.00 | 0.00 | 0.00 | 0.00 | 0.00 | 0.00 | 0.00 | 0.00 | 0.00 | 0.00 |      |
| 9.2         | 0.3400  | 0.3850  | 0.3493  | 0.3844 | 0.3464  | 0.3393  | 0.3423 | 0.4753  | 0.4816  | 0.4458 | 0.1942 | 0.2275  | 0.2284  | 0.2597 | 0.3363  | 0.4280  | 0.4193  | 0.3983 | 0.1882 | 0.3718  | 0.3622 | 0.3493 |        | 0.00    | 0.00   | 0.00   | 0.00   | 0.00   | 0.00 | 0.00 | 0.00 | 0.00 | 0.00 | 0.00 | 0.00 | 0.00 | 0.00 | 0.00 | 0.00 | 0.00 | 0.00 | 0.00 |      |
| 10.2        | 0.4694  | 0.4879  | 0.4750  | 0.4960 | 0.3865  | 0.3719  | 0.3819 | 0.4825  | 0.4904  | 0.4667 | 0.3541 | 0.3451  | 0.3533  | 0.4086 | 0.3370  | 0.4066  | 0.3755  | 0.3642 | 0.2734 | 0.3018  | 0.2894 | 0.2409 | 0.3013 |         | 0.71   | 0.90   | 0.00   | 0.00   | 0.00 | 0.00 | 0.00 | 0.00 | 0.00 | 0.00 | 0.00 | 0.00 | 0.00 | 0.00 | 0.00 | 0.00 | 0.00 |      |      |
| 10.3        | 0.5334  | 0.5382  | 0.5330  | 0.5378 | 0.4626  | 0.4372  | 0.4665 | 0.5158  | 0.5200  | 0.5097 | 0.4209 | 0.4168  | 0.4222  | 0.4693 | 0.3877  | 0.4425  | 0.4078  | 0.4038 | 0.3220 | 0.3503  | 0.3343 | 0.2799 | 0.3937 | -0.0134 |        | 0.49   | 0.00   | 0.00   | 0.00 | 0.00 | 0.00 | 0.00 | 0.00 | 0.00 | 0.00 | 0.00 | 0.00 | 0.00 | 0.00 | 0.00 | 0.00 |      |      |
| 10.4        | 0.4996  | 0.5092  | 0.5013  | 0.5141 | 0.4141  | 0.3923  | 0.4104 | 0.4935  | 0.5006  | 0.4843 | 0.3809 | 0.3538  | 0.3621  | 0.4148 | 0.3661  | 0.4232  | 0.3915  | 0.3826 | 0.2948 | 0.3593  | 0.3420 | 0.2965 | 0.3453 | -0.0159 | 0.0009 |        | 0.00   | 0.00   | 0.00 | 0.00 | 0.00 | 0.00 | 0.00 | 0.00 | 0.00 | 0.00 | 0.00 | 0.00 | 0.00 | 0.00 | 0.00 |      |      |
| 11.3        | 0.3279  | 0.3515  | 0.3293  | 0.3503 | 0.3170  | 0.3130  | 0.3143 | 0.3197  | 0.3271  | 0.2881 | 0.2850 | 0.3537  | 0.3556  | 0.3928 | 0.1548  | 0.1827  | 0.1792  | 0.1724 | 0.2961 | 0.3500  | 0.3500 | 0.3435 | 0.2376 | 0.2046  | 0.2586 | 0.2231 |        | 0.41   | 0.00 | 0.00 | 0.00 | 0.00 | 0.00 | 0.00 | 0.00 | 0.00 | 0.00 | 0.00 | 0.00 | 0.00 | 0.00 |      |      |
| 11.4        | 0.3236  | 0.3538  | 0.3266  | 0.3527 | 0.3148  | 0.3108  | 0.3120 | 0.3168  | 0.3269  | 0.2798 | 0.2995 | 0.3652  | 0.3650  | 0.4059 | 0.1775  | 0.2166  | 0.2174  | 0.2087 | 0.3118 | 0.3700  | 0.3730 | 0.3730 | 0.2419 | 0.2493  | 0.3219 | 0.2745 | 0.0023 |        | 0.00 | 0.00 | 0.00 | 0.00 | 0.00 | 0.00 | 0.00 | 0.00 | 0.00 | 0.00 | 0.00 | 0.00 | 0.00 |      |      |
| 12.3        | 0.4180  | 0.4476  | 0.4263  | 0.4573 | 0.3192  | 0.3127  | 0.3176 | 0.4755  | 0.4814  | 0.4522 | 0.3913 | 0.4267  | 0.4240  | 0.4556 | 0.4404  | 0.4954  | 0.4929  | 0.4792 | 0.3834 | 0.4551  | 0.4581 | 0.4658 | 0.3772 | 0.4226  | 0.4704 | 0.4478 | 0.3460 | 0.3438 |      | 0.00 | 0.00 | 0.00 | 0.00 | 0.00 | 0.00 | 0.00 | 0.00 | 0.00 | 0.00 | 0.00 | 0.00 |      |      |
| 13.3        | 0.5000  | 0.5135  | 0.5055  | 0.5219 | 0.4101  | 0.3917  |        |         |         |        |        |         |         |        |         |         |         |        |        |         |        |        |        |         |        |        |        |        |      |      |      |      |      |      |      |      |      |      |      |      |      |      |      |
