# Supplementary material for: Area-Wide Elimination of Subterranean Termite Colonies Using a Novaluron Bait
Source: MDPI journal article supplement (doi:10.3390/insects12030192), 2021-02-24
Supplement: s1 [file s1]

# Treatment Site

| Colony.year | 1.1    | 2.1     | 2.2     | 2.3     | 2.4    | 3.1     | 3.2     | 3.3    | 4.1    | 5.1     | 5.2     | 5.3    | 6.1     | 6.2    | 6.3    | 7.1    | 7.2     | 7.3    | 8.1     | 8.2     | 8.3    | 9.2    | 9.3    | 10.2    | 10.3   | 11.2    | 11.3    | 11.4   | 12.3   | 13.3    | 13.4   | 14.4   | 15.4   | v.1  | v.2  | v.3  |
|-------------|--------|---------|---------|---------|--------|---------|---------|--------|--------|---------|---------|--------|---------|--------|--------|--------|---------|--------|---------|---------|--------|--------|--------|---------|--------|---------|---------|--------|--------|---------|--------|--------|--------|------|------|------|
| 1.1         |        | 0.00    | 0.00    | 0.00    | 0.00   | 0.00    | 0.00    | 0.00   | 0.00   | 0.00    | 0.00    | 0.00   | 0.00    | 0.00   | 0.00   | 0.00   | 0.00    | 0.00   | 0.00    | 0.00    | 0.00   | 0.00   | 0.00   | 0.00    | 0.00   | 0.00    | 0.00    | 0.00   | 0.00   | 0.00    | 0.00   | 0.00   | 0.00   | 0.00 | 0.00 |      |
| 2.1         | 0.5899 |         | 0.53    | 0.09    | 0.82   | 0.00    | 0.00    | 0.00   | 0.00   | 0.00    | 0.00    | 0.00   | 0.00    | 0.00   | 0.00   | 0.00   | 0.00    | 0.00   | 0.00    | 0.00    | 0.00   | 0.00   | 0.00   | 0.00    | 0.00   | 0.00    | 0.00    | 0.00   | 0.00   | 0.00    | 0.00   | 0.00   | 0.00   | 0.00 | 0.00 |      |
| 2.2         | 0.5753 | 0.0044  |         | 0.15    | 1.00   | 0.00    | 0.00    | 0.00   | 0.00   | 0.00    | 0.00    | 0.00   | 0.00    | 0.00   | 0.00   | 0.00   | 0.00    | 0.00   | 0.00    | 0.00    | 0.00   | 0.00   | 0.00   | 0.00    | 0.00   | 0.00    | 0.00    | 0.00   | 0.00   | 0.00    | 0.00   | 0.00   | 0.00   | 0.00 | 0.00 |      |
| 2.3         | 0.5840 | -0.0032 | 0.0042  |         | 0.45   | 0.00    | 0.00    | 0.00   | 0.00   | 0.00    | 0.00    | 0.00   | 0.00    | 0.00   | 0.00   | 0.00   | 0.00    | 0.00   | 0.00    | 0.00    | 0.01   | 0.00   | 0.00   | 0.00    | 0.00   | 0.00    | 0.00    | 0.00   | 0.00   | 0.00    | 0.01   | 0.00   | 0.00   | 0.00 |      |      |
| 2.4         | 0.5847 | -0.0120 | -0.0242 | -0.0136 |        | 0.00    | 0.00    | 0.00   | 0.00   | 0.00    | 0.00    | 0.00   | 0.00    | 0.00   | 0.00   | 0.00   | 0.00    | 0.00   | 0.00    | 0.00    | 0.00   | 0.00   | 0.00   | 0.00    | 0.00   | 0.00    | 0.00    | 0.00   | 0.00   | 0.01    | 0.00   | 0.00   | 0.00   | 0.00 |      |      |
| 3.1         | 0.4954 | 0.3915  | 0.3341  | 0.3554  | 0.3369 |         | 0.88    | 0.80   | 0.00   | 0.00    | 0.00    | 0.00   | 0.09    | 0.00   | 0.00   | 0.00   | 0.00    | 0.05   | 0.00    | 0.00    | 0.00   | 0.00   | 0.00   | 0.00    | 0.00   | 0.00    | 0.00    | 0.00   | 0.00   | 0.00    | 0.00   | 0.00   | 0.00   | 0.00 | 0.00 |      |
| 3.2         | 0.4796 | 0.3641  | 0.2972  | 0.3184  | 0.2955 | -0.0130 |         | 1.00   | 0.02   | 0.00    | 0.00    | 0.00   | 0.00    | 0.00   | 0.00   | 0.00   | 0.00    | 0.00   | 0.00    | 0.01    | 0.01   | 0.00   | 0.00   | 0.00    | 0.00   | 0.00    | 0.00    | 0.00   | 0.00   | 0.00    | 0.00   | 0.00   | 0.00   | 0.00 |      |      |
| 3.3         | 0.4714 | 0.3589  | 0.2986  | 0.3235  | 0.3003 | -0.0049 | -0.0227 |        | 0.00   | 0.00    | 0.00    | 0.00   | 0.06    | 0.00   | 0.00   | 0.00   | 0.00    | 0.02   | 0.00    | 0.00    | 0.00   | 0.00   | 0.00   | 0.00    | 0.00   | 0.00    | 0.00    | 0.00   | 0.00   | 0.00    | 0.00   | 0.00   | 0.00   | 0.00 |      |      |
| 4.1         | 0.5611 | 0.2872  | 0.2291  | 0.2818  | 0.2410 | 0.3156  | 0.2689  | 0.2704 |        | 0.00    | 0.00    | 0.00   | 0.01    | 0.00   | 0.00   | 0.00   | 0.00    | 0.00   | 0.04    | 0.02    | 0.01   | 0.00   | 0.00   | 0.06    | 0.10   | 0.00    | 0.00    | 0.00   | 0.00   | 0.00    | 0.01   | 0.00   | 0.00   | 0.00 |      |      |
| 5.1         | 0.4990 | 0.4539  | 0.4036  | 0.3893  | 0.3903 | 0.3697  | 0.3351  | 0.3545 | 0.4286 |         | 0.70    | 0.14   | 0.00    | 0.00   | 0.00   | 0.00   | 0.00    | 0.00   | 0.00    | 0.00    | 0.00   | 0.00   | 0.00   | 0.00    | 0.02   | 0.00    | 0.00    | 0.00   | 0.00   | 0.00    | 0.00   | 0.00   | 0.00   | 0.00 |      |      |
| 5.2         | 0.4301 | 0.4256  | 0.3831  | 0.3752  | 0.3776 | 0.3572  | 0.3358  | 0.3455 | 0.3958 | -0.0112 |         | 0.14   | 0.00    | 0.00   | 0.00   | 0.00   | 0.00    | 0.00   | 0.00    | 0.00    | 0.00   | 0.00   | 0.00   | 0.00    | 0.00   | 0.00    | 0.00    | 0.00   | 0.00   | 0.00    | 0.00   | 0.00   | 0.00   | 0.00 |      |      |
| 5.3         | 0.4015 | 0.4417  | 0.4015  | 0.3936  | 0.3998 | 0.3716  | 0.3569  | 0.3596 | 0.4102 | 0.0168  | -0.0002 |        | 0.00    | 0.00   | 0.00   | 0.00   | 0.00    | 0.00   | 0.00    | 0.00    | 0.00   | 0.00   | 0.00   | 0.00    | 0.00   | 0.00    | 0.00    | 0.00   | 0.00   | 0.00    | 0.00   | 0.00   | 0.00   | 0.00 |      |      |
| 6.1         | 0.5515 | 0.3535  | 0.2791  | 0.3188  | 0.2818 | 0.1839  | 0.1459  | 0.1613 | 0.0638 | 0.3355  | 0.3322  | 0.3431 |         | 0.13   | 0.98   | 0.00   | 0.00    | 0.00   | 0.00    | 0.00    | 0.00   | 0.00   | 0.00   | 0.01    | 0.02   | 0.00    | 0.00    | 0.00   | 0.00   | 0.00    | 0.00   | 0.00   | 0.00   | 0.00 |      |      |
| 6.2         | 0.5444 | 0.3614  | 0.2908  | 0.3325  | 0.2949 | 0.2279  | 0.1891  | 0.2037 | 0.0804 | 0.3502  | 0.3376  | 0.3402 | -0.0065 |        | 0.01   | 0.00   | 0.00    | 0.00   | 0.00    | 0.00    | 0.00   | 0.00   | 0.00   | 0.00    | 0.00   | 0.01    | 0.00    | 0.00   | 0.00   | 0.00    | 0.00   | 0.00   | 0.00   | 0.00 |      |      |
| 6.3         | 0.5100 | 0.3539  | 0.2917  | 0.3315  | 0.2949 | 0.1960  | 0.1638  | 0.1801 | 0.1032 | 0.3428  | 0.3293  | 0.3205 | -0.0334 | 0.0117 |        | 0.00   | 0.00    | 0.03   | 0.00    | 0.00    | 0.00   | 0.00   | 0.00   | 0.00    | 0.00   | 0.00    | 0.00    | 0.00   | 0.00   | 0.00    | 0.00   | 0.00   | 0.00   | 0.00 |      |      |
| 7.1         | 0.5409 | 0.3097  | 0.2426  | 0.2713  | 0.2418 | 0.0824  | 0.0551  | 0.0626 | 0.1736 | 0.3180  | 0.3202  | 0.3383 | 0.1158  | 0.1615 | 0.1390 |        | 0.52    | 0.34   | 0.02    | 0.02    | 0.00   | 0.00   | 0.00   | 0.00    | 0.00   | 0.00    | 0.00    | 0.00   | 0.00   | 0.00    | 0.00   | 0.00   | 0.00   | 0.00 |      |      |
| 7.2         | 0.5332 | 0.3005  | 0.2444  | 0.2591  | 0.2392 | 0.1552  | 0.1239  | 0.1341 | 0.2248 | 0.3046  | 0.3106  | 0.3287 | 0.1423  | 0.2090 | 0.1622 | 0.0197 |         | 0.71   | 0.00    | 0.00    | 0.00   | 0.00   | 0.00   | 0.00    | 0.00   | 0.00    | 0.00    | 0.00   | 0.00   | 0.01    | 0.00   | 0.00   | 0.00   |      |      |      |
| 7.3         | 0.5457 | 0.3010  | 0.2351  | 0.2660  | 0.2349 | 0.1467  | 0.1130  | 0.1224 | 0.1595 | 0.3252  | 0.3261  | 0.3441 | 0.0902  | 0.1571 | 0.1143 | 0.0231 | -0.0086 |        | 0.00    | 0.00    | 0.00   | 0.00   | 0.00   | 0.00    | 0.00   | 0.00    | 0.00    | 0.00   | 0.01   | 0.00    | 0.00   | 0.00   | 0.00   |      |      |      |
| 8.1         | 0.6080 | 0.3968  | 0.3289  | 0.3713  | 0.3391 | 0.2933  | 0.2630  | 0.2659 | 0.2227 | 0.4335  | 0.4098  | 0.4262 | 0.2058  | 0.2180 | 0.2263 | 0.1940 | 0.2553  | 0.2146 |         | 0.47    | 0.69   | 0.02   | 0.00   | 0.00    | 0.00   | 0.00    | 0.00    | 0.01   | 0.00   | 0.00    | 0.00   | 0.00   | 0.00   | 0.00 |      |      |
| 8.2         | 0.5893 | 0.3310  | 0.2599  | 0.3064  | 0.2672 | 0.2712  | 0.2277  | 0.2361 | 0.1324 | 0.4100  | 0.3919  | 0.4074 | 0.1620  | 0.1804 | 0.1967 | 0.1316 | 0.1894  | 0.1530 | 0.0040  |         | 0.62   | 0.01   | 0.00   | 0.00    | 0.00   | 0.00    | 0.00    | 0.02   | 0.00   | 0.00    | 0.00   | 0.00   | 0.00   | 0.00 |      |      |
| 8.3         | 0.5753 | 0.3630  | 0.2985  | 0.3395  | 0.3060 | 0.2865  | 0.2518  | 0.2583 | 0.2033 | 0.4155  | 0.3944  | 0.4040 | 0.1997  | 0.2140 | 0.2258 | 0.1673 | 0.2227  | 0.1934 | -0.0149 | -0.0057 |        | 0.00   | 0.00   | 0.00    | 0.00   | 0.00    | 0.00    | 0.00   | 0.00   | 0.00    | 0.00   | 0.00   | 0.00   | 0.00 |      |      |
| 9.2         | 0.4065 | 0.2946  | 0.2169  | 0.2225  | 0.2157 | 0.2402  | 0.1868  | 0.2079 | 0.2863 | 0.2948  | 0.3033  | 0.3233 | 0.2252  | 0.2419 | 0.2476 | 0.2041 | 0.2167  | 0.2075 | 0.1870  | 0.1803  | 0.1796 |        | 0.64   | 0.00    | 0.00   | 0.00    | 0.00    | 0.00   | 0.01   | 0.00    | 0.00   | 0.00   | 0.00   | 0.00 | 0.00 |      |
| 9.3         | 0.4667 | 0.3288  | 0.2428  | 0.2638  | 0.2464 | 0.2432  | 0.2049  | 0.2196 | 0.2882 | 0.3292  | 0.3266  | 0.3421 | 0.2192  | 0.2312 | 0.2384 | 0.2178 | 0.2497  | 0.2239 | 0.1715  | 0.1757  | 0.1727 | 0.0044 |        | 0.00    | 0.00   | 0.00    | 0.00    | 0.00   | 0.00   | 0.00    | 0.00   | 0.00   | 0.00   | 0.00 | 0.00 |      |
| 10.2        | 0.6313 | 0.5188  | 0.4714  | 0.4764  | 0.4951 | 0.3583  | 0.3641  | 0.3465 | 0.4694 | 0.4944  | 0.4455  | 0.4687 | 0.3429  | 0.3322 | 0.3138 | 0.3747 | 0.4148  | 0.3832 | 0.3366  | 0.3080  | 0.3098 | 0.3181 | 0.2422 |         | 1.00   | 0.00    | 0.00    | 0.00   | 0.00   | 0.00    | 0.00   | 0.00   | 0.00   | 0.00 | 0.00 |      |
| 10.3        | 0.6244 | 0.5081  | 0.4556  | 0.4607  | 0.4757 | 0.3376  | 0.3369  | 0.3257 | 0.4461 | 0.4721  | 0.4321  | 0.4559 | 0.3137  | 0.3066 | 0.2926 | 0.3521 | 0.3928  | 0.3607 | 0.3183  | 0.2902  | 0.2950 | 0.2983 | 0.2275 | -0.0320 |        | 0.00    | 0.00    | 0.00   | 0.00   | 0.00    | 0.00   | 0.00   | 0.00   | 0.00 | 0.00 |      |
| 11.2        | 0.4771 | 0.3016  | 0.2300  | 0.2515  | 0.2200 | 0.2364  | 0.1773  | 0.2027 | 0.1158 | 0.2361  | 0.2518  | 0.2701 | 0.0826  | 0.0693 | 0.1064 | 0.1249 | 0.1493  | 0.1223 | 0.2036  | 0.1516  | 0.1921 | 0.1725 | 0.1946 | 0.3643  | 0.3363 |         | 0.97    | 1.00   | 0.00   | 0.00    | 0.01   | 0.00   | 0.00   | 0.00 |      |      |
| 11.3        | 0.4859 | 0.2934  | 0.2245  | 0.2618  | 0.2233 | 0.2323  | 0.1830  | 0.2020 | 0.0903 | 0.2879  | 0.2825  | 0.2866 | 0.0789  | 0.0674 | 0.1079 | 0.1296 | 0.1672  | 0.1275 | 0.1878  | 0.1434  | 0.1827 | 0.1912 | 0.1979 | 0.3164  | 0.2974 | -0.0429 |         | 0.94   | 0.00   | 0.00    | 0.00   | 0.00   | 0.00   | 0.00 |      |      |
| 11.4        | 0.5068 | 0.3279  | 0.2511  | 0.2833  | 0.2462 | 0.2312  | 0.1812  | 0.2021 | 0.1088 | 0.2643  | 0.2704  | 0.2844 | 0.0741  | 0.0622 | 0.0978 | 0.1336 | 0.1734  | 0.1342 | 0.1925  | 0.1525  | 0.1878 | 0.1859 | 0.1895 | 0.3329  | 0.3082 | -0.0642 | -0.0279 |        | 0.00   | 0.00    | 0.00   | 0.00   | 0.00   | 0.00 |      |      |
| 12.3        | 0.5396 | 0.3214  | 0.2664  | 0.2696  | 0.2593 | 0.1827  | 0.1499  | 0.1661 | 0.2775 | 0.3116  | 0.3184  | 0.3385 | 0.1433  | 0.2165 | 0.1618 | 0.1474 | 0.0917  | 0.1026 | 0.2620  | 0.2193  | 0.2414 | 0.1939 | 0.2286 | 0.3608  | 0.3350 | 0.1781  | 0.2015  | 0.2052 |        | 0.00    | 0.00   | 0.01   | 0.01   | 0.00 | 0.00 |      |
| 13.3        | 0.5737 | 0.3487  | 0.3377  | 0.2984  | 0.3223 | 0.4211  | 0.4072  | 0.4090 | 0.4807 | 0.3963  | 0.3782  | 0.3927 | 0.4378  | 0.4428 | 0.4299 | 0.3864 | 0.3539  | 0.3648 | 0.4844  | 0.4641  | 0.4621 | 0.3726 | 0.3929 | 0.5293  | 0.5144 | 0.3517  | 0.3684  | 0.3749 | 0.3884 |         | 1.00   | 0.00   | 0.00   | 0.00 | 0.00 |      |
| 13.4        | 0.5753 | 0.3498  | 0.3317  | 0.2911  | 0.3139 | 0.4070  | 0.3859  | 0.3928 | 0.4840 | 0.3683  | 0.3626  | 0.3842 | 0.4195  | 0.4271 | 0.4154 | 0.3651 | 0.3322  | 0.3464 | 0.4744  | 0.4512  | 0.4508 | 0.3464 | 0.3720 | 0.5378  | 0.5187 | 0.3188  | 0.3443  | 0.3451 | 0.3631 | -0.0350 |        | 0.00   | 0.00   | 0.00 | 0.00 |      |
| 14.4        | 0.4840 | 0.3437  | 0.2859  | 0.2966  | 0.2791 | 0.1940  | 0.1651  | 0.1790 | 0.1985 | 0.2723  | 0.2748  | 0.2757 | 0.0869  | 0.1116 | 0.0852 | 0.1120 | 0.1002  | 0.1068 | 0.3063  | 0.2684  | 0.2924 | 0.2333 | 0.2572 | 0.3996  | 0.3803 | 0.1083  | 0.1285  | 0.1267 | 0.1541 | 0.3861  | 0.3628 |        | 0.00   | 0.00 | 0.00 |      |
| 15.4        | 0.6004 | 0.3243  | 0.2923  | 0.2882  | 0.2839 | 0.3783  | 0.3319  | 0.3442 | 0.3635 | 0.3696  | 0.3714  | 0.3957 | 0.3459  | 0.3647 | 0.3616 | 0.2831 | 0.2529  | 0.2775 | 0.4170  | 0.3483  | 0.3814 | 0.3016 | 0.3600 | 0.5479  | 0.5279 | 0.2505  | 0.2824  | 0.2978 | 0.2659 | 0.4460  | 0.4249 | 0.2862 |        | 0.00 | 0.00 | 0.00 |
| v.1         | 0.5520 | 0.4577  | 0.4095  | 0.3957  | 0.3998 | 0.3126  | 0.2890  | 0.3024 | 0.4675 | 0.3237  | 0.3297  | 0.3515 | 0.3784  | 0.3916 | 0.3850 | 0.2917 | 0.3010  | 0.3273 | 0.4096  | 0.3977  | 0.3925 | 0.2842 | 0.3196 | 0.5028  | 0.4816 | 0.2996  | 0.3303  | 0.3243 | 0.3113 | 0.4022  | 0.3785 | 0.3048 | 0.3809 |      | 0.84 | 0.89 |
| v.2         | 0.4794 | 0.4094  | 0.3767  | 0.3725  | 0.3732 | 0.3077  | 0.2926  | 0.3020 | 0.4101 | 0.3282  |         |        |         |        |        |        |         |        |         |         |        |        |        |         |        |         |         |        |        |         |        |        |        |      |      |      |
